# Supplementary material
Source: Research Square preprint supplement (doi:10.21203/rs.3.rs-10178891/v1)
Supplement: Supplementary file 1 [file 8c1ea024a33cb2478f955063.docx]

**Catalysis Letters**

Biowaste-Derived Lagerstroemia speciosa Fruit Shell Ash (WELSA) as an Efficient Green Catalyst for One-Pot Synthesis of 2-Amino-4*H*-Benzochromenes

Ashwini Pawara, Arvind Pawara, Sandeep Patilb, Sanyuja S. Patilb, Pradeep Patilc*, Suresh Patila

aDepartment of Chemistry, Raje Ramrao Mahavidyalaya, Jath, Dist. Sangli, 416404, Maharashtra, India

bDepartment of Chemistry, Padmabhushan Dr. Vasantraodada Patil Mahavidyalaya, Tasgaon, Dist. Sangli, 416312, Maharashtra, India

cDepartment of Chemistry, DKTE Society’s, Textile and Engineering Institute, Ichalkaranji 416115, MS, India

*Corresponding author: Tel: +91 9527702738; E-mail: patilpradeep197@gmail.com

| **Sr. No.** | **Table of Contents** | **Page No.** |
| --- | --- | --- |
| 1 | Spectral data of the 2-Amino-4*H*-Benzochromene derivatives | 1-11 |

Compound **4a**, Table 2

**Fig. 1** FT-IR spectrum

**Fig. 2 1**H NMR spectrum

**Fig. 3 13**C NMR spectrum

Compound **4b**, Table 2

**Fig. 4** FT-IR spectrum

**Fig. 5 1**H NMR spectrum

**Fig. 6 13**C NMR spectrum

Compound **4c**, Table 2

**Fig. 7** FT-IR spectrum

**Fig. 8 1**H NMR spectrum

**Fig. 9 13**C NMR spectrum

Compound **4d**, Table 2

**Fig. 10** FT-IR spectrum

**Fig. 11 1**H NMR spectrum

**Fig. 12 13**C NMR spectrum

**Fig. 13** Mass spectrum

Compound **4g**, Table 2

**Fig. 14** FT-IR spectrum

Compound **4g**, Table 2

**Fig. 15 1**H NMR spectrum

**Fig. 16 13**C NMR spectrum

Compound **4h**, Table 2

**Fig. 17** FT-IR spectrum

**Fig. 18 1**H NMR spectrum

**Fig. 19 13**C NMR spectrum

**Fig. 20** Mass spectrum
